# Supplementary material for: One-pot two-step synthesis of alkyl levulinates directly from furfural by combining Ni3Sn2 alloy nanoparticles and montmorillonite K10
Source: Royal Society of Chemistry journal article supplement (doi:10.1039/d2se00824f), 2022-01-01
Supplement: d2se00824f1.pdf [file d2se00824f1.pdf]

## One-pot two-step synthesis of alkyl levulinates directly from furfural by combining Ni<sub>3</sub>Sn<sub>2</sub> alloy nanoparticles and montmorillonite K10

Nobutaka Yamanaka,<sup>\*a</sup> Daiki Abe,<sup>a</sup> Masaiku Miwaka-Saiga,<sup>a</sup> Kenji Yasunaga,<sup>a</sup> Hiroshi Yamada<sup>a</sup> and Shogo Shimazu<sup>b</sup>

<sup>a</sup> Department of Applied Chemistry, National Defense Academy, 1-10-20 Hashirimizu, Yokosuka, Kanagawa 239-8686, Japan. E-mail: yamanaka@nda.ac.jp.

<sup>b</sup> Department of Applied Chemistry and Biotechnology, Graduate School of Engineering, Chiba University, 1-33 Yayoi, Inage, Chiba 263-8522, Japan.

**Table S1** Effect of alcohol solvent on the alcoholysis of furfuryl alcohol by montmorillonite K10 in long-chain alcohol solvents<sup>a</sup>

| Entry | Alcohol solvent | Conv. / % | Yield <sup>b</sup> / % |
|-------|-----------------|-----------|------------------------|
| 1     | 1-Pentanol      | >99       | 47                     |
| 2     | 1-Hexanol       | >99       | 38                     |

<sup>a</sup> Reaction conditions: montmorillonite K10, 50 mg; furfuryl alcohol, 0.30 mmol; naphthalene, 0.30 mmol; solvent, 3.0 mL; N<sub>2</sub> pressure, 1.0 MPa; reaction temperature, 393 K; reaction time, 12 h. <sup>b</sup> Corresponding alkyl levulinate yield was identified and quantified using <sup>1</sup>H NMR.

**Table S2** Comparison of the catalytic results obtained for the alcoholysis of furfuryl alcohol to ethyl levulinate by montmorillonite K10 and other Brønsted acid catalysts.

| Entry | Catalyst                                        | Reaction temperature / K | Reaction time / h | Yield / % | References |
|-------|-------------------------------------------------|--------------------------|-------------------|-----------|------------|
| 1     | Montmorillonite K10                             | 393                      | 8                 | 73        | This work  |
| 2     | Al-TUD-1                                        | 413                      | 2                 | 48        | [1]        |
| 3     | H <sub>3</sub> PW <sub>12</sub> O <sub>40</sub> | 393                      | 2                 | 63        | [2]        |
| 4     | GCC                                             | 423                      | 1                 | 67        | [3]        |
| 5     | Purolite CT151                                  | 353                      | 5                 | 71        | [4]        |

**Table S3** The catalytic activity of Ni<sub>3</sub>Sn<sub>2</sub> alloy nanoparticles for the chemoselective hydrogenation of furfural to furfuryl alcohol compared with various alcohol parameters

| Alcohol solvent | Time / h | $\epsilon^a$ | $\pi^{*b}$ | $\alpha^c$ | $\beta^d$ |
|-----------------|----------|--------------|------------|------------|-----------|
| Methanol        | 20       | 32.7         | 0.60       | 0.93       | 0.66      |
| Ethanol         | 4        | 24.6         | 0.54       | 0.83       | 0.75      |
| 1-Propanol      | 28       | 20.1         | 0.52       | 0.78       | 0.84      |
| 1-Butanol       | 30       | 17.8         | 0.47       | 0.79       | 0.88      |
| 2-Propanol      | 26       | 19.9         | 0.48       | 0.76       | 0.95      |

<sup>a</sup> Dielectric constant [5,6]. <sup>b</sup> Dipolarity/polarizability [7]. <sup>c</sup> Hydrogen-bond donor capability [7]. <sup>d</sup> Hydrogen-bond acceptor capability [5,7].

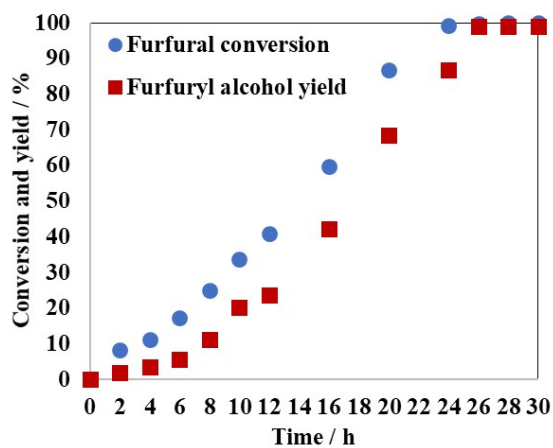

**Fig. S1** Furfural hydrogenation by  $\text{Ni}_3\text{Sn}_2$  alloy nanoparticles in 2-propanol solvent. Reaction conditions:  $\text{Ni}_3\text{Sn}_2$  alloy nanoparticles, 2.75 mg; furfural, 0.30 mmol (furfural/Ni molar ratio = 15); *n*-dodecane, 0.30 mmol; 2-propanol, 3.0 mL;  $\text{H}_2$  pressure, 1.0 MPa; reaction temperature, 453 K.

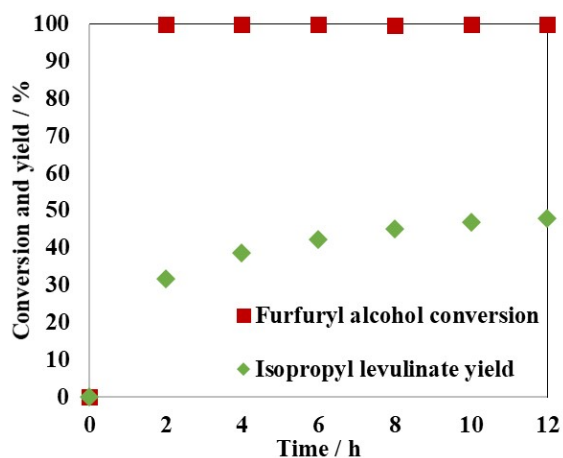

**Fig. S2** Alcoholysis of the in situ formed furfuryl alcohol by montmorillonite K10 in 2-propanol solvent. Reaction conditions:  $\text{Ni}_3\text{Sn}_2$  alloy nanoparticles, 2.75 mg; montmorillonite K10, 50 mg; furfural, 0.30 mmol; *n*-dodecane, 0.30 mmol;  $\text{N}_2$  pressure, 1.0 MPa; reaction temperature, 393 K; reaction time, 12 h.

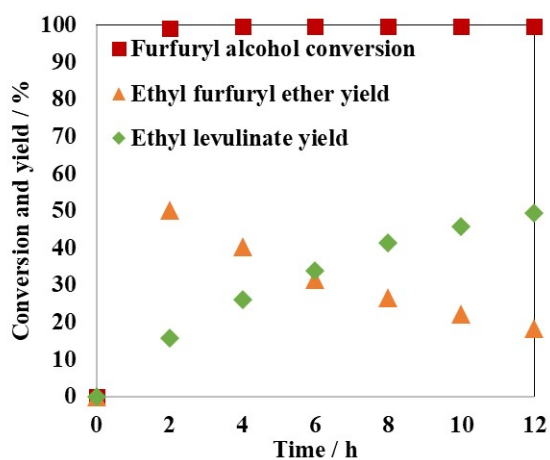

**Fig. S3** Time profile for the alcoholysis of furfuryl alcohol by montmorillonite K10 in ethanol solvent (6.0 mL). Reaction conditions: montmorillonite K10, 50 mg; furfuryl alcohol, 0.30 mmol; *n*-dodecane, 0.30 mmol; ethanol,

6.0 mL; N<sub>2</sub> pressure, 1.0 MPa; reaction temperature, 393 K.

## References

- [1] P. Neves, S. Lima, M. Pillinger, S. M. Rocha, J. Rocha and A. A. Valente, *Catal. Today*, 2013, **218-219**, 76.
- [2] D. Song, S. An, Y. Sun and Y. Guo, *J. Catal.*, 2016, **333**, 184.
- [3] G. Zhao, M. Liu, X. Xia, L. Li and B. Xu, *Molecules*, 2019, **24**, 1881.
- [4] M. Annatelli, G. Trapasso, L. Lena and F. Aricò, *Sustain. Chem.*, 2021, **2**, 493.
- [5] H. Wan, A. Vitter, R. V. Chaudhari and B. Subramaniam, *J. Catal.*, 2014, **309**, 174.
- [6] Y.-C Wu and Y.-C Tai, *J. Nanopart. Res.*, 2013, **15**, 1686.
- [7] M. J. Kamlet J.-L. M. Abboud, M. H. Abraham and R. W. Taft, *J. Org. Chem.*, 1983, **48**, 2877.
